# Supplementary material for: A gene expression panel for estimating age in males and females of the sleeping sickness vector Glossina morsitans
Source: PubMed Central journal article supplement (PMC8491940; doi:10.1371/journal.pntd.0009797), 2021-09-23
Supplement: pntd.0009797.s005.pdf [file pntd.0009797.s005.pdf]

**A gene expression panel for estimating age in males  
and females of the disease vector *Glossina morsitans***

Eric R. Lucas, Alistair C. Darby, Stephen J. Torr, Martin J. Donnelly

**Electronic Supplementary Material**  
**S3 Text (Supplementary figures)**

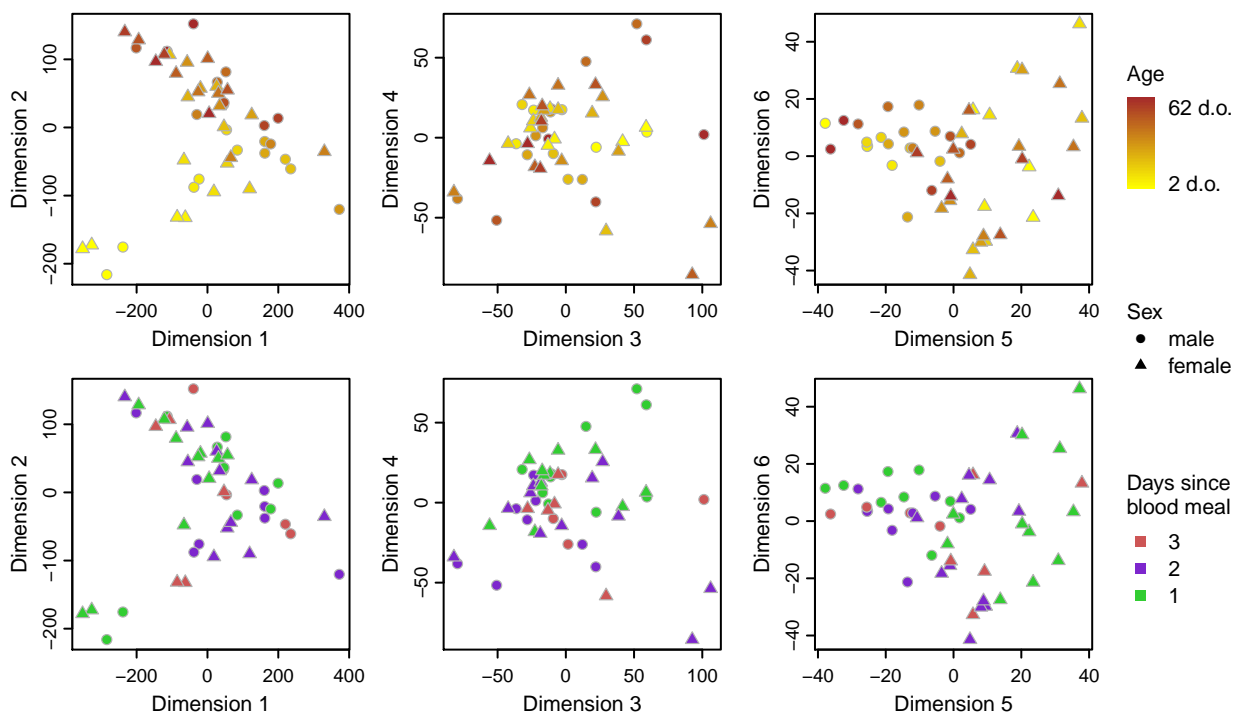

**Fig. A:** Principle component analysis (PCA) of RNAseq data, coloured by age (top) or days since blood meal (bottom).

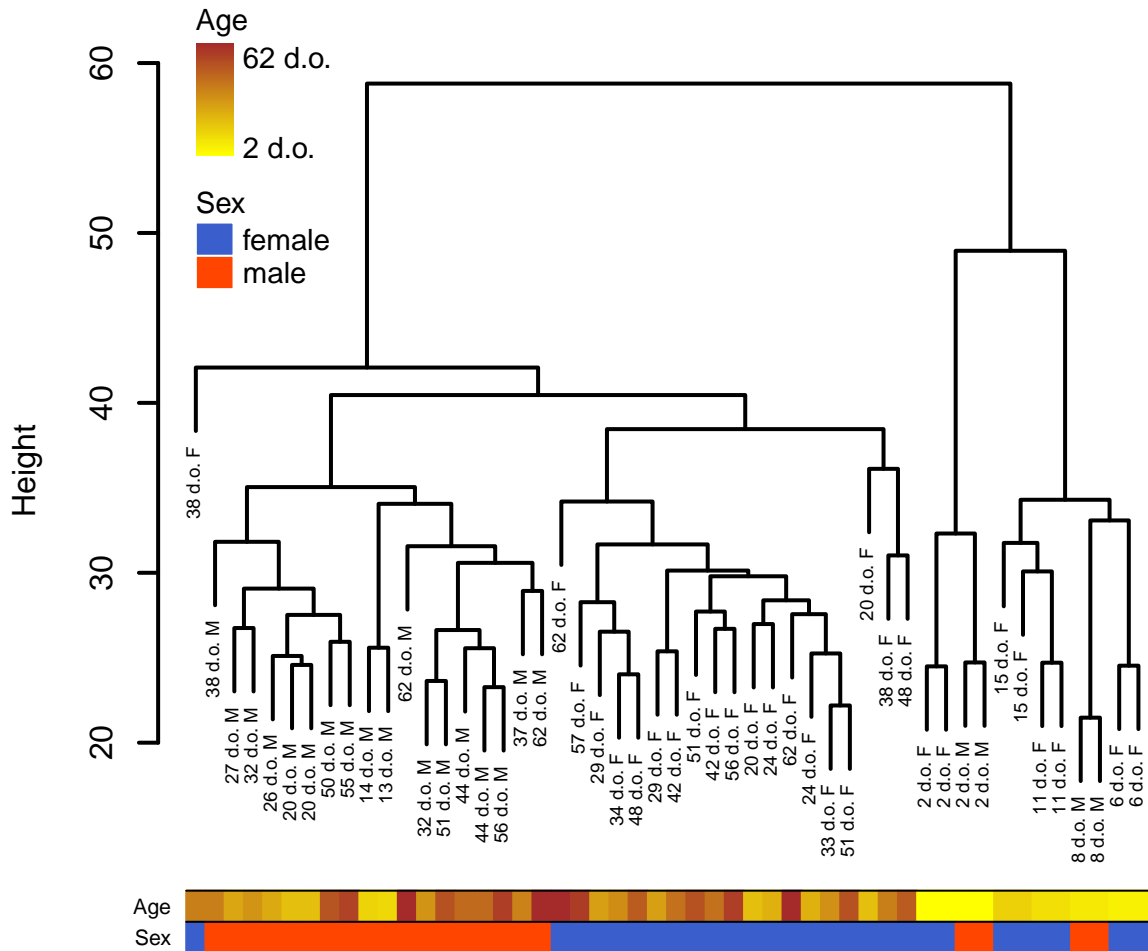

**Fig. B:** Hierarchical clustering of samples from RNAseq data reveal that young individuals (<15 days old) cluster together, with older individuals clustering by sex.

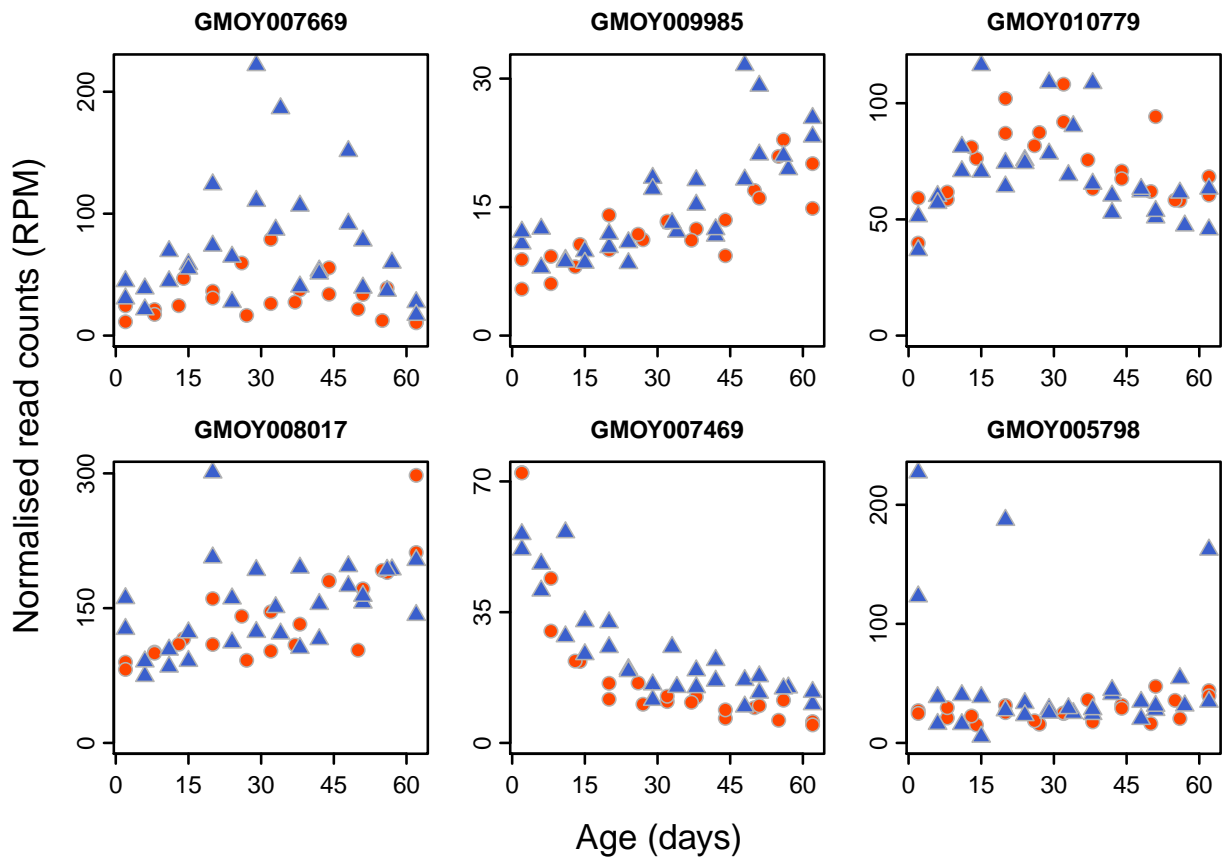

**Fig. C:** Expression changes with age for the 6 genes most strongly differentially expressed by age when only individuals older than 15 days were included in the model. Females shown as blue triangles; males shown as orange circles.

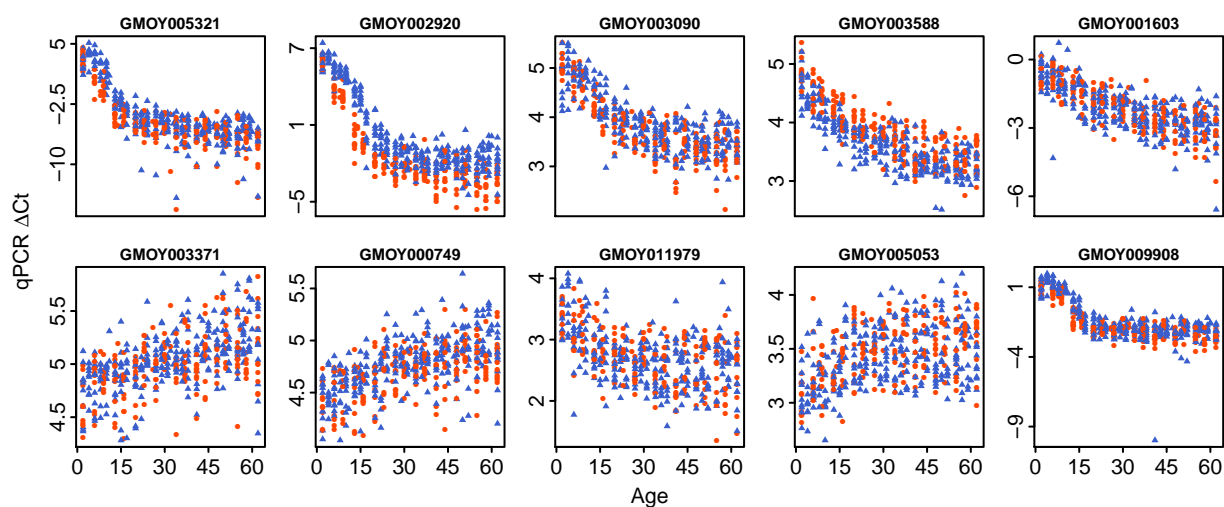

**Fig. D:** Correlation of qPCR measures of gene expression against age for the ten genes chosen as age markers. Females shown as blue triangles; males shown as orange circles.

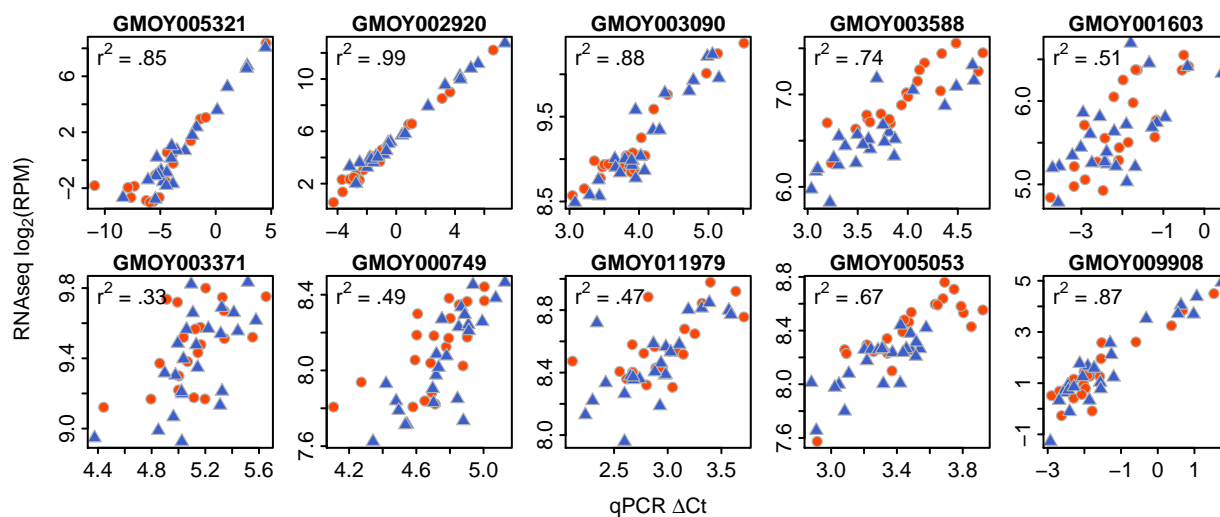

**Fig. E:** Expression measured by qPCR and RNAseq were highly correlated in the samples in which both techniques were used. Expression by RNAseq is here measured as  $\log_2(\text{RPM} + 0.1)$ . RPM = reads per million. 0.1 added to avoid taking logs of 0. Females shown as blue triangles; males shown as orange circles.

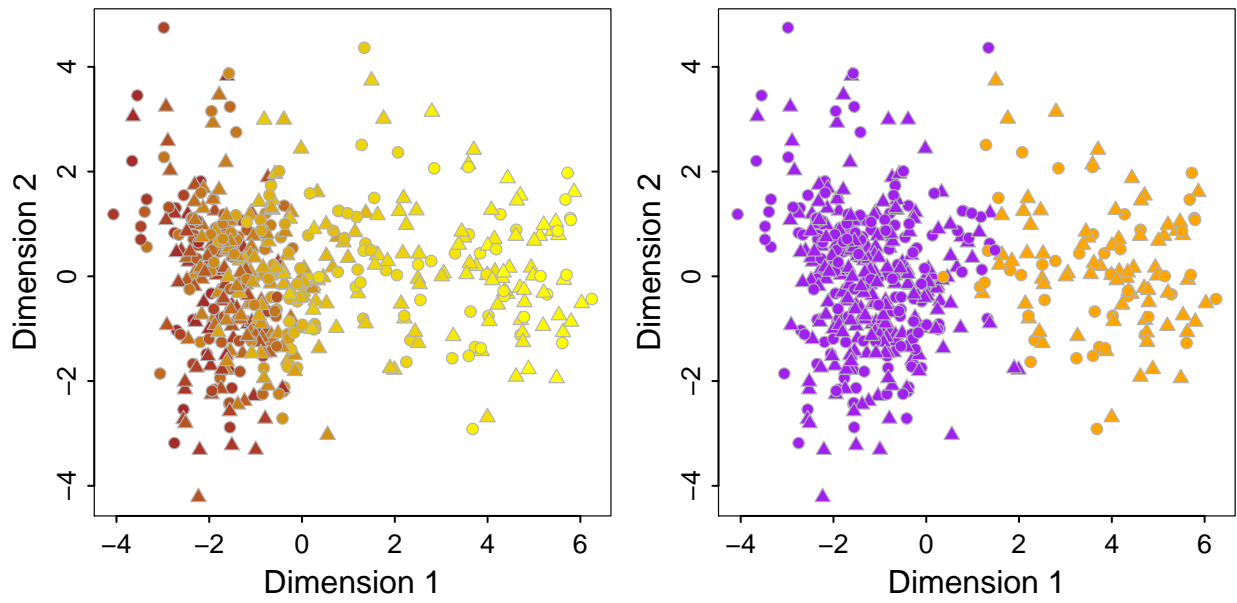

**Fig. F:** PCA of samples based on qPCR measurements of expression of the 10 age-related genes. Left: colour-coded continuously from 2 days old (yellow) to 62 days old (brown). Right: colour-coded categorically into  $\leq 15$  days (orange) and  $> 15$  days (purple). Females shown as triangles; males shown as circles.

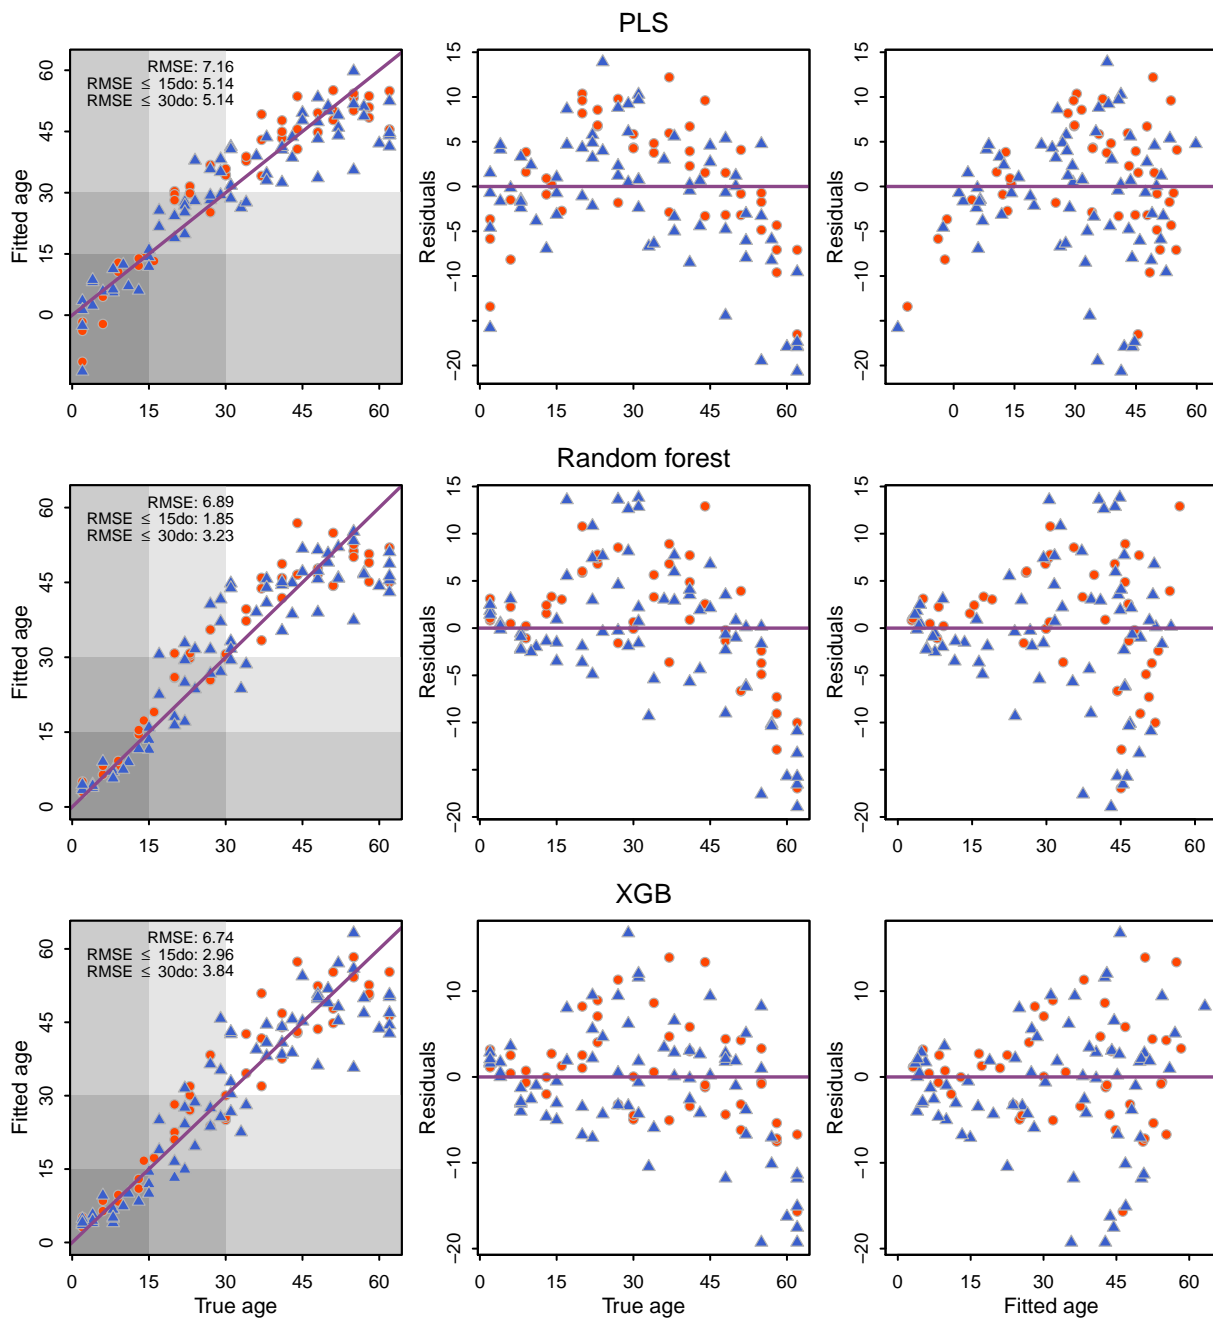

**Fig. G:** Age prediction performance of PLS, random forest and XGB regression models. Females shown as blue triangles; males shown as orange circles.

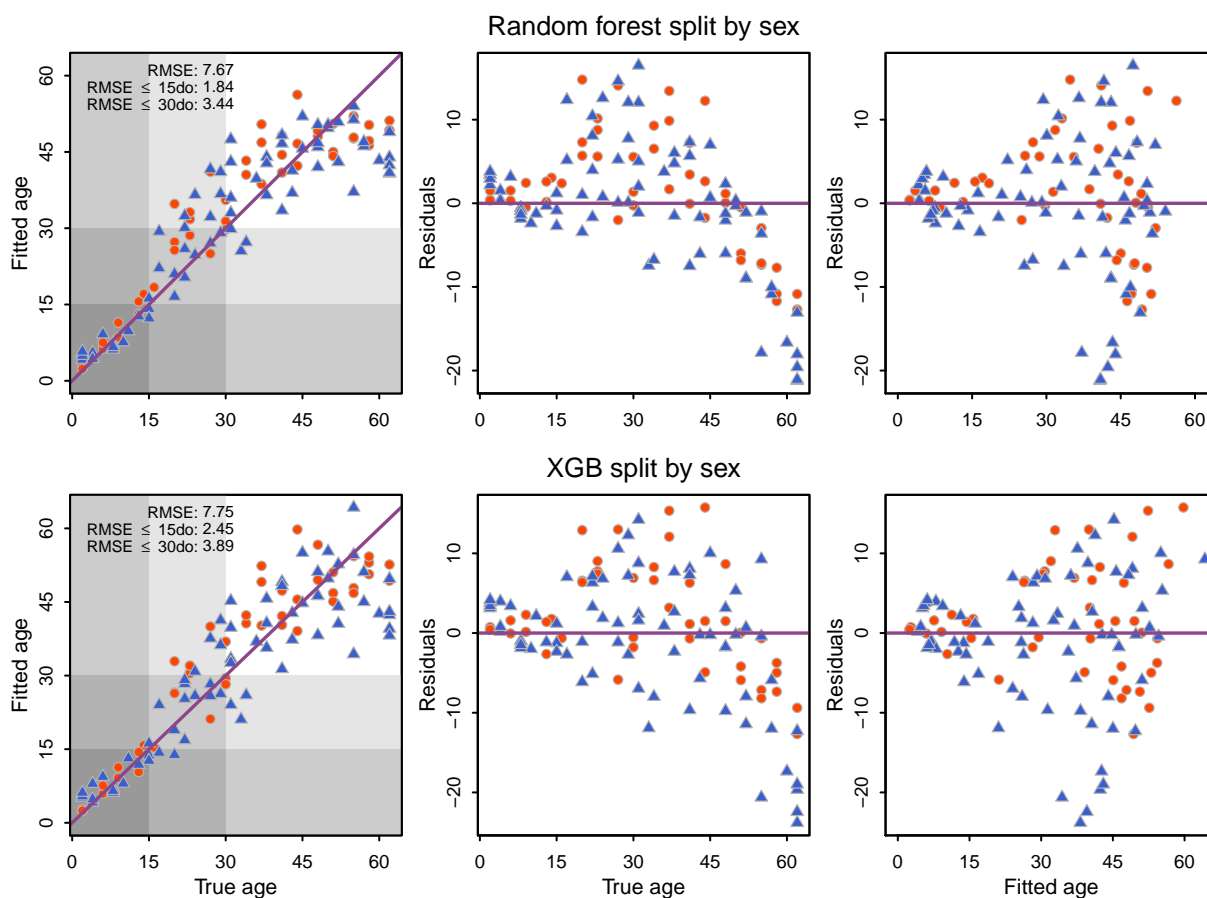

**Fig. H:** Age prediction performance of random forest and XGB regression models trained separately on females and males. Females shown as blue triangles; males shown as orange circles. Purple line shows idealised perfect prediction.

|                     |       | <i>Decision tree<br/>prediction</i> |     | <i>Random forest<br/>prediction</i> |     | <i>XGB<br/>prediction</i> |     |
|---------------------|-------|-------------------------------------|-----|-------------------------------------|-----|---------------------------|-----|
|                     |       | Young                               | Old | Young                               | Old | Young                     | Old |
| <i>True<br/>age</i> | Young | 25                                  | 3   | 27                                  | 1   | 28                        | 0   |
|                     | Old   | 0                                   | 90  | 1                                   | 89  | 1                         | 89  |

**Fig. I:** Accuracy at classifying samples into age groups of  $\leq 15$  and  $> 15$  days old was 99% for the XGB classification model, 98% for the random forest and 97% for the decision tree.
